# Supplementary material for: Ternary assemblies comprising metal–salophen complexes and 4,4′-bipyridine
Source: Royal Society of Chemistry journal article supplement (doi:10.1039/c5nj03210e), 2016-01-01
Supplement: c5nj03210e1.pdf [file c5nj03210e1.pdf]

## **Ternary assemblies comprising metal-salophen complexes and 4,4'- bipyridine**

*Ferran Sabaté,<sup>a</sup> Raquel Gavara,<sup>a</sup> Ilaria Giannicchi,<sup>b</sup> Ramon Bosque,<sup>a</sup> Antonella Dalla*

*Cort<sup>b,\*</sup> and Laura Rodríguez.<sup>a,\*</sup>*

<sup>a</sup> Departament de Química Inorgànica, Universitat de Barcelona, Martí i Franquès 1-11,  
08028 Barcelona, Spain. Fax: +34 934907725; Tel.: +34 934039130.

e-mail: [laura.rodriiguez@qi.ub.es](mailto:laura.rodriiguez@qi.ub.es)

<sup>b</sup> Dipartimento di Chimica and IMC-CNR Sezione Meccanismi di Reazione, Università  
La Sapienza, Box 34 Roma 62, 00185 Roma, Italy.

Fax: +39 06490421; Tel.: +39 0649913087.

e-mail: [antonella.dallacort@uniroma1.it](mailto:antonella.dallacort@uniroma1.it)

## **Supporting Information**

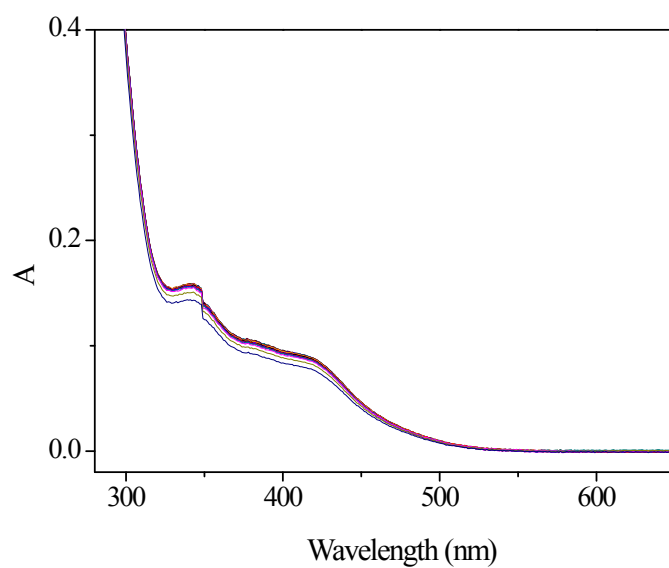

**Figure S1.** Absorption spectra of *ca.*  $9 \cdot 10^{-6}$ M solutions of **2B** in ethanol in the presence of increasing amounts of 4,4'-bipyridine.

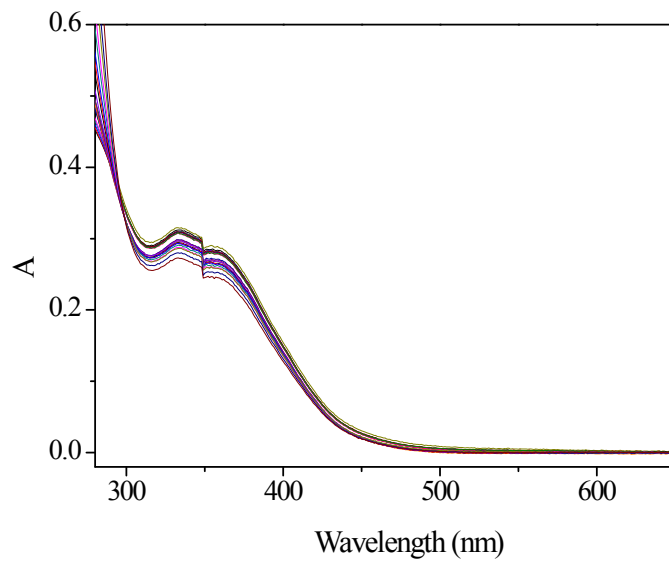

**Figure S2.** Absorption spectra of *ca.*  $9 \cdot 10^{-6}$ M solutions of **2C** in ethanol in the presence of increasing amounts of 4,4'-bipyridine.

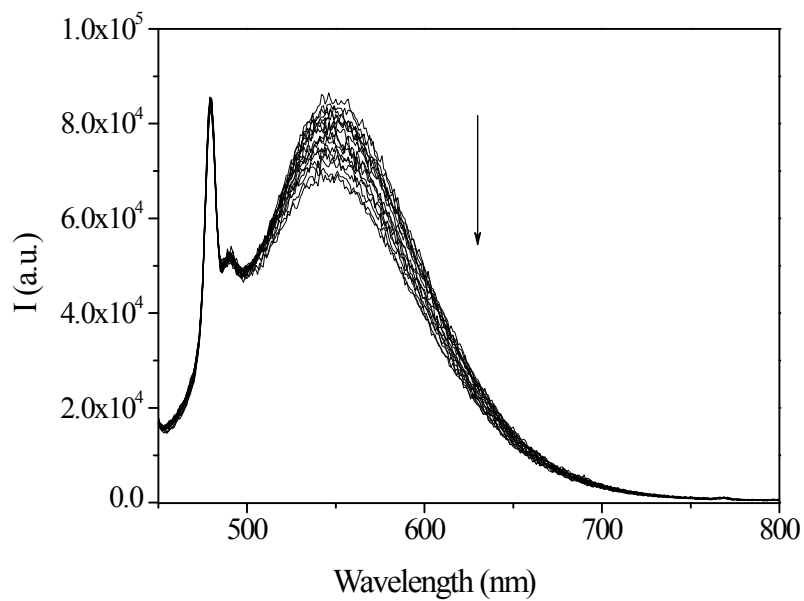

**Figure S3.** Emission spectra of *ca.*  $9 \cdot 10^{-6}$ M solutions of **1A** in ethanol in the presence of increasing amounts of 4,4'-bipyridine.

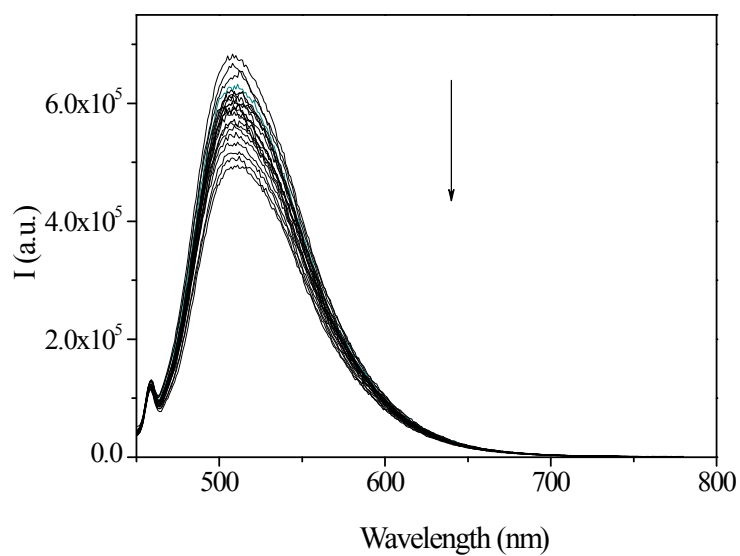

**Figure S4** Emission spectra of *ca.*  $9 \cdot 10^{-6}$ M solutions of **2A** in ethanol in the presence of increasing amounts of 4,4'-bipyridine.

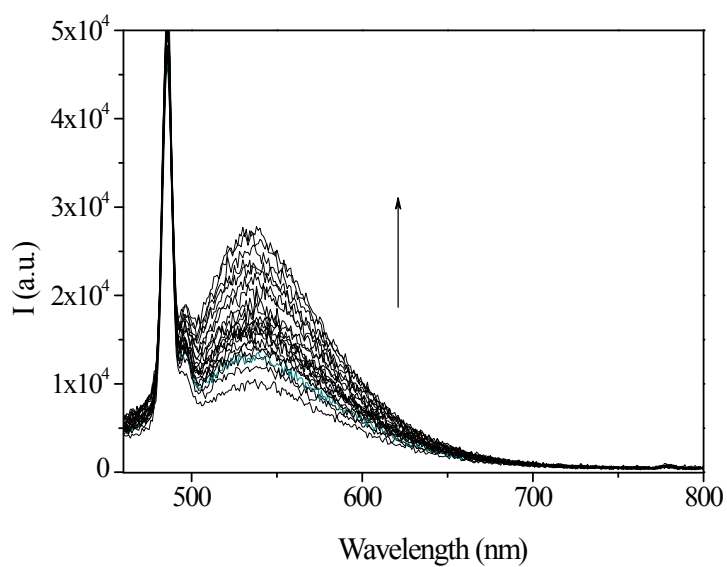

**Figure S5.** Emission spectra of *ca.*  $9 \cdot 10^{-6}$ M solutions of **1B** in ethanol in the presence of increasing amounts of 4,4'-bipyridine.

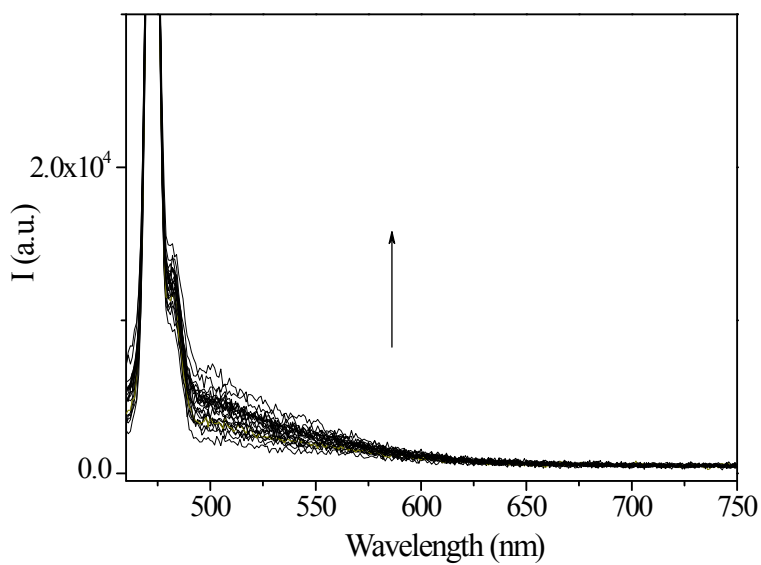

**Figure S6.** Emission spectra of *ca.*  $9 \cdot 10^{-6}$ M solutions of **2B** in ethanol in the presence of increasing amounts of 4,4'-bipyridine.

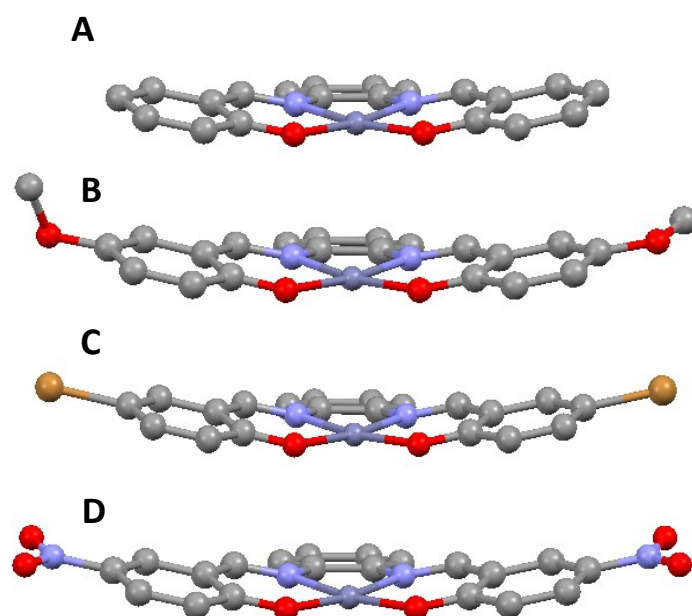

**Figures S7.** Side view of the minimum energy geometry calculated for the mononuclear Zn model (A), 1A (B), 2A (C) and 3A (D).
